# Supplementary material for: The P-Site Loop of the Universally Conserved Bacterial Ribosomal Protein L5 Is Required for Maintaining Both Translation Rate and Fidelity
Source: MDPI journal article supplement (doi:10.3390/ijms241814285), 2023-09-19
Supplement: s1 [file s1]

Table S1: Translation fidelity in the control and  $\Delta$ PSL strains

| uL5 variant  | <i>lacZ</i> variant | LacZ activity, Miller units | Standard deviation |
|--------------|---------------------|-----------------------------|--------------------|
| wild type    | WT                  | 13943                       | $\pm 455$          |
| wild type    | +1 frameshift       | 16.2                        | $\pm 1.8$          |
| wild type    | -1 frameshift       | 3.0                         | $\pm 0.2$          |
| wild type    | Premature UAA       | 0.5                         | $\pm 0.0$          |
| wild type    | Premature UAG       | 6.9                         | $\pm 0.5$          |
| wild type    | Premature UGA       | 8.9                         | $\pm 0.3$          |
| $\Delta$ PSL | WT                  | 18703                       | $\pm 2303$         |
| $\Delta$ PSL | +1 frameshift       | 19.4                        | $\pm 0.6$          |
| $\Delta$ PSL | -1 frameshift       | 8.4                         | $\pm 0.5$          |
| $\Delta$ PSL | Premature UAA       | 2.1                         | $\pm 0.1$          |
| $\Delta$ PSL | Premature UAG       | 63.4                        | $\pm 10.2$         |
| $\Delta$ PSL | Premature UGA       | 46.8                        | $\pm 1.9$          |

Table S2: Oligonucleotides used in the work

| Name          | Usage                                  | Sequence                                                               | Source    |
|---------------|----------------------------------------|------------------------------------------------------------------------|-----------|
| AK07          | The <i>lac</i> fusion check/sequencing | 5'- GTGAACGCTCTCCTGAGTAGG                                              | [30]      |
| AK08b         | The <i>lac</i> fusion check/sequencing | 5'- CATTGCGCCATTCAGGCTGCGCAAC                                          | [30]      |
| AK45          | Constructing <i>lac</i> fusions        | 5'-GACGCCCCGCATAAACTGCCAGGAATTAAGAGACGTTCTGAAATGAGCTGTTGACAATTAATCATCC | This work |
| AK46          | Constructing <i>lac</i> fusions        | 5'-GACACTTTACCTCATAGCTGGCATAATCCACACATTATACGAGCCGGATGATTAATTGTCAACAGC  | This work |
| AK47          | Constructing <i>lac</i> fusions        | 5'- AGTCACGACGTTGTAAAACGACGGCCAGTGAATCCGTAATAGCCATTTGTGCAGCGAGTTC      | This work |
| AK226         | Constructing <i>lac</i> fusions        | 5'-GCTTAGCGTAATCATGGTGAGTTGAGCAGTAGATTTACG                             | This work |
| L5delta73-80F | 73-80 deletion                         | 5'-CACCAAAGCACGCAAAACAGGGCTATCCGATC                                    | This work |
| L5delta73-80R | 73-80 deletion                         | 5'-GATCGGATAGCCCTGTTTGCCTGCTTTGGTG                                     | This work |
| rplE34cat-F1  | <i>rplE</i> knockout, forward          | 5'-CTACAATTCTGTCATGCAAGTCCCTCGGGTCGAGAAGATCATGGAGAAAAAATCACTGGAT       | This work |
| rplEcat-R1    | <i>rplE</i> knockout, reverse          | 5'-CTTTTCATTGATTGCTTAGCCATTTAGTAACCCTACCTTACGCCCGCCCTGCCACTC           | This work |
| rplE-check-F  | knockout verification, sequencing      | 5'-TGTAGGCTTTAGATTGAAGACGG                                             | [2]       |
| rplE-check-R  | knockout verification, sequencing      | 5'-CGCTTTCAGTTCAGCGCGTTTCGC                                            | [2]       |
| rplE_rec_F    | Restoring chromosomal <i>rplE</i>      | 5'-ATGGCGAAACTGCATGAT                                                  | This work |
| rplE_rec_R    | Restoring chromosomal <i>rplE</i>      | 5'-CGGTGGTATATCCAGTGATTTTTTCTCCATGATCTTCTCCACTTACTTGCGGAACGGGAAG       | This work |

Table S3: *Escherichia coli* strains and plasmids used in the work

| Name           | Genotype/description                                                                                   | Reference/source              |
|----------------|--------------------------------------------------------------------------------------------------------|-------------------------------|
| <b>Strains</b> |                                                                                                        |                               |
| OK391a         | MS02 <i>lacI'</i> :: <i>bla-Ptrc</i> *- <i>g32-lacZ</i> -1 (wt)                                        | this work                     |
| OK391b         | MS02 <i>lacI'</i> :: <i>bla-Ptrc</i> *- <i>g32-lacZ</i> -2 (+1 frameshift)                             | this work                     |
| OK391c         | MS02 <i>lacI'</i> :: <i>bla-Ptrc</i> *- <i>g32-lacZ</i> -3 (-1 frameshift)                             | this work                     |
| OK391d         | MS02 <i>lacI'</i> :: <i>bla-Ptrc</i> *- <i>g32-lacZ</i> -4 (premature UAA)                             | this work                     |
| OK391e         | MS02 <i>lacI'</i> :: <i>bla-Ptrc</i> *- <i>g32-lacZ</i> -5 (premature UAG)                             | this work                     |
| OK391f         | MS02 <i>lacI'</i> :: <i>bla-Ptrc</i> *- <i>g32-lacZ</i> -6 (premature UGA)                             | this work                     |
| OK392a         | MG1655 <i>lacI'</i> :: <i>bla-Ptrc</i> *- <i>g32-lacZ</i> -1 (wt)                                      | this work                     |
| OK392b         | MG1655 <i>lacI'</i> :: <i>bla-Ptrc</i> *- <i>g32-lacZ</i> -2 (+1 frameshift)                           | this work                     |
| OK392c         | MG1655 <i>lacI'</i> :: <i>bla-Ptrc</i> *- <i>g32-lacZ</i> -3 (-1 frameshift)                           | this work                     |
| OK392d         | MG1655 <i>lacI'</i> :: <i>bla-Ptrc</i> *- <i>g32-lacZ</i> -4 (premature UAA)                           | this work                     |
| OK392e         | MG1655 <i>lacI'</i> :: <i>bla-Ptrc</i> *- <i>g32-lacZ</i> -5 (premature UAG)                           | this work                     |
| OK392f         | MG1655 <i>lacI'</i> :: <i>bla-Ptrc</i> *- <i>g32-lacZ</i> -6 (premature UGA)                           | this work                     |
| OK404a         | OK392a <i>rplE1</i> :: <i>cat</i> (wild type uL5)                                                      | this work                     |
| OK404b         | OK392b <i>rplE1</i> :: <i>cat</i> (wild type uL5)                                                      | this work                     |
| OK404c         | OK392c <i>rplE1</i> :: <i>cat</i> (wild type uL5)                                                      | this work                     |
| OK404d         | OK392d <i>rplE1</i> :: <i>cat</i> (wild type uL5)                                                      | this work                     |
| OK404e         | OK392e <i>rplE1</i> :: <i>cat</i> (wild type uL5)                                                      | this work                     |
| OK404f         | OK392f <i>rplE1</i> :: <i>cat</i> (wild type uL5)                                                      | this work                     |
| OK406a         | OK392a <i>rplEΔ73-80</i> :: <i>cat</i> (uL5ΔPSL)                                                       | this work                     |
| OK406b         | OK392b <i>rplEΔ73-80</i> :: <i>cat</i> (uL5ΔPSL)                                                       | this work                     |
| OK406c         | OK392c <i>rplEΔ73-80</i> :: <i>cat</i> (uL5ΔPSL)                                                       | this work                     |
| OK406d         | OK392d <i>rplEΔ73-80</i> :: <i>cat</i> (uL5ΔPSL)                                                       | this work                     |
| OK406e         | OK392e <i>rplEΔ73-80</i> :: <i>cat</i> (uL5ΔPSL)                                                       | this work                     |
| OK406f         | OK392f <i>rplEΔ73-80</i> :: <i>cat</i> (uL5ΔPSL)                                                       | this work                     |
| MG1655         | <i>rph-1</i>                                                                                           | wild type <i>E. coli</i> [28] |
| MS02           | <i>gal490 ldcI857 Δ(cro-bioA) lacI'</i> :: <i>bla-cat-sacB-lacZYA</i>                                  | [30]                          |
| MS45           | MS02 <i>lacI'</i> :: <i>bla-Ptrc-g32-lacZYA</i>                                                        | this work                     |
| MS45a          | MS02 <i>lacI'</i> :: <i>bla-Ptrc</i> *- <i>g32-lacZYA</i> (G insertion into the -35 promoter sequence) | this work                     |
| MS128/pNK12    | NM300 <i>ΔrplE34</i> :: <i>cat</i> (transformed with the complementing plasmid pNK12)                  | this work                     |
| MS129          | MG1655 <i>rplE1</i> :: <i>cat</i> (wild type uL5)                                                      | this work                     |

|                 |                                                                                             |                    |
|-----------------|---------------------------------------------------------------------------------------------|--------------------|
| MS129a          | MG1655 <i>rplE</i> Δ73-80:: <i>cat</i> (uL5ΔPSL)                                            | this work          |
| NM300           | MG1655 <i>lacX74 mini-λ-Tet</i>                                                             | N. Majdalani (NIH) |
| <b>Plasmids</b> |                                                                                             |                    |
| pACYC184        | cloning vector, Tet <sup>R</sup> , Cam <sup>R</sup>                                         | NEB, [26]          |
| pNK12           | arabinose-induced expression vector with cloned wild type <i>rplE</i> ORF, Amp <sup>R</sup> | [3]                |
| pNK14           | same as pNK12 with mutated <i>rplE</i> ORF encoding uL5ΔPSL                                 | this work          |
| pSG25           | <i>lacZ</i> (wild type)                                                                     | [7]                |
| pSGlac7         | <i>lacZ</i> (+1 frameshift)                                                                 | [7]                |
| pSG12DP         | <i>lacZ</i> (-1 frameshift)                                                                 | [7]                |
| pSG853          | <i>lacZ</i> (premature UAA stop codon)                                                      | [7]                |
| pSG163          | <i>lacZ</i> (premature UAG stop codon)                                                      | [7]                |
| pSG3/4          | <i>lacZ</i> (premature UGA stop codon)                                                      | [7]                |

---
